# Supplementary material for: The auxin receptor TIR1 homolog (PagFBL 1) regulates adventitious rooting through interactions with Aux/IAA28 in Populus
Source: PubMed Central journal article supplement (PMC6335065; doi:10.1111/pbi.12980), 2018-07-24
Supplement: PBI-17-338-s001.pdf [file PBI-17-338-s001.pdf]

**The auxin receptor TIR1 homolog (PagFBL1) regulates  
adventitious rooting through interactions with Aux/IAA28 in  
*Populus***

Wenbo Shu, Houjun Zhou, Cheng Jiang, Shutang Zhao, Liuqiang Wang, Quanzi Li, Zhangqi Yang, Andrew Groover and Meng-Zhu Lu\*

**Additional material**

**Table S1.** The same up-regulated DEGs appeared from 0 h to 12 h after AR induction in #18 and from 12 h to 24 h after AR induction in WT.

| Gene_ID              | #18-12h<br>_vs_#18<br>-0h_log<br>2FC | #18-24h_v<br>s_#18-12h<br>_log2FC | WT-12h<br>_vs_WT<br>-0h_log2<br>FC | WT-24h_v<br>s_WT-12h<br>_log2FC | COG_class_annotation                                               | KOG_<br>class | KEGG_pathway_<br>annotation          | Swissprot_annotation                                                                                               | nr_annotation                                                                           |
|----------------------|--------------------------------------|-----------------------------------|------------------------------------|---------------------------------|--------------------------------------------------------------------|---------------|--------------------------------------|--------------------------------------------------------------------------------------------------------------------|-----------------------------------------------------------------------------------------|
| Potri.001G0<br>19900 | Inf                                  | 0.2345810                         | Inf                                | 1.8625550                       | --                                                                 | --            | --                                   | Extensin-2 (Precursor)<br>GN=T14E10_160 OS=Arabidopsis<br>thaliana (Mouse-ear cress) PE=2<br>SV=1                  | hypothetical protein<br>POPTR_0001s05740g [Populus<br>trichocarpa]                      |
| Potri.001G0<br>20000 | Inf                                  | 0.4696441                         | Inf                                | 2.8966146                       | --                                                                 | --            | --                                   | Extensin-2 (Precursor)<br>GN=T14E10_160 OS=Arabidopsis<br>thaliana (Mouse-ear cress) PE=2<br>SV=1                  | hypothetical protein<br>POPTR_0001s05740g [Populus<br>trichocarpa]                      |
| Potri.001G3<br>16000 | 1.8631920                            | 0.9981807                         | 0.7500300                          | 1.2398488                       | --                                                                 | --            | --                                   | --                                                                                                                 | PREDICTED: uncharacterized protein<br>LOC105140484 isoform X3 [Populus<br>euphratica]   |
| Potri.001G3<br>91300 | Inf                                  | 0.7302930                         | --                                 | 2.5266726                       | --                                                                 | --            | --                                   | Epidermis-specific secreted<br>glycoprotein EP1 (Precursor)<br>GN=EP1 OS=Daucus carota (Wild<br>carrot) PE=1 SV=1  | PREDICTED: epidermis-specific<br>secreted glycoprotein EP1-like<br>[Populus euphratica] |
| Potri.003G1<br>34500 | 1.5267398                            | 0.8153657                         | 0.6928093                          | 1.1518316                       | --                                                                 | --            | --                                   | 3-oxo-Delta(4,5)-steroid<br>5-beta-reductase GN=T22A6.50<br>OS=Arabidopsis thaliana<br>(Mouse-ear cress) PE=1 SV=1 | hypothetical protein<br>POPTR_0003s13440g [Populus<br>trichocarpa]                      |
| Potri.004G2<br>35400 | 2.3785447                            | 0.4066500                         | 2.0886848                          | 1.5028184                       | Secondary metabolites<br>biosynthesis, transport and<br>catabolism | [QI]          | Carotenoid biosynthesis<br>(ko00906) | Abscisic acid 8'-hydroxylase<br>1 GN=CYP707A1 OS=Arabidopsis<br>thaliana (Mouse-ear cress) PE=2<br>SV=1            | cytochrome P450 family protein<br>[Populus trichocarpa]                                 |
| Potri.006G0<br>22800 | Inf                                  | -0.1472222                        | Inf                                | 2.1324767                       | --                                                                 | [GC]          | --                                   | 7-deoxyloganetin<br>glucosyltransferase GN=UGT85A24<br>OS=Gardenia jasminoides (Cape<br>jasmine) PE=1 SV=1         | hypothetical protein<br>POPTR_0006s02390g [Populus<br>trichocarpa]                      |
| Potri.007G0<br>49900 | Inf                                  | 0.7804099                         | 2.7937453                          | 2.3872208                       | Secondary metabolites<br>biosynthesis, transport and<br>catabolism | [Q]           | --                                   | Isoflavone 2'-hydroxylase<br>GN=CYP81E1 OS=Glycyrrhiza<br>echinata (Licorice) PE=1 SV=2                            | cytochrome P450 family protein<br>[Populus trichocarpa]                                 |

|                      |           |           |                |           |                                     |     |                                                                             |                                                                                                                       |                                                                          |
|----------------------|-----------|-----------|----------------|-----------|-------------------------------------|-----|-----------------------------------------------------------------------------|-----------------------------------------------------------------------------------------------------------------------|--------------------------------------------------------------------------|
| Potri.010G1<br>42900 | Inf       | 0.7025578 | -0.439384<br>3 | 1.8985202 | --                                  | --  | --                                                                          | Basic leucine zipper 1 GN=BZIP1<br>OS=Arabidopsis thaliana<br>(Mouse-ear cress) PE=1 SV=1                             | bZIP family transcription factor family<br>protein [Populus trichocarpa] |
| Potri.011G1<br>10000 | Inf       | 0.8553482 | 0.1534412      | 2.7545114 | --                                  | --  | --                                                                          | Epidermis-specific secreted<br>glycoprotein EP1 (Precursor)<br>GN=EP1 OS=Daucus carota (Wild<br>carrot) PE=1 SV=1     | curculin-like lectin family protein<br>[Populus trichocarpa]             |
| Potri.011G1<br>10500 | 2.1935498 | 0.5561984 | -0.042579<br>8 | 1.2733573 | --                                  | --  | --                                                                          | Epidermis-specific secreted<br>glycoprotein EP1 (Precursor)<br>GN=EP1 OS=Daucus carota (Wild<br>carrot) PE=1 SV=1     | curculin-like lectin family protein<br>[Populus trichocarpa]             |
| Potri.011G1<br>49400 | 4.2559801 | 1.1075760 | --             | 2.1652676 | --                                  | --  | --                                                                          | --                                                                                                                    | hypothetical protein<br>POPTR_0011s15240g [Populus<br>trichocarpa]       |
| Potri.011G1<br>55900 | Inf       | 0.4596266 | 4.0697413      | 2.2121502 | Energy production and<br>conversion | --  | --                                                                          | Reticuline oxidase-like protein<br>(Precursor) GN=At4g20830<br>OS=Arabidopsis thaliana<br>(Mouse-ear cress) PE=1 SV=2 | FAD-binding domain-containing family<br>protein [Populus trichocarpa]    |
| Potri.012G0<br>56800 | Inf       | 0.4314388 | Inf            | 2.9234351 | --                                  | --  | --                                                                          | LOB domain-containing protein 41<br>GN=F16B3.18 OS=Arabidopsis<br>thaliana (Mouse-ear cress) PE=2<br>SV=1             | hypothetical protein<br>POPTR_0012s05340g [Populus<br>trichocarpa]       |
| Potri.014G1<br>45100 | 4.3826091 | 0.7344635 | 0.5754231      | 2.3999154 | --                                  | --  | Flavonoid biosynthesis<br>(ko00941);; Circadian<br>rhythm - plant (ko04712) | Chalcone synthase GN=CHS<br>OS=Vitis vinifera (Grape) PE=2<br>SV=1                                                    | chalcone synthase family protein<br>[Populus trichocarpa]                |
| Potri.019G0<br>93700 | Inf       | 0.4561178 | Inf            | 1.7976403 | --                                  | [R] | Amino sugar and<br>nucleotide sugar<br>metabolism (ko00520)                 | Endochitinase PR4 (Precursor)<br>GN=CHI4 OS=Phaseolus vulgaris<br>(Kidney bean) PE=2 SV=1                             | chitinase family protein, partial<br>[Populus trichocarpa]               |
| Potri.019G1<br>16600 | 2.3827853 | 0.5128408 | -1.360171<br>2 | 2.2006538 | --                                  | --  | --                                                                          | --                                                                                                                    | unknown [Populus trichocarpa]                                            |
| Potri.001G3<br>36200 | Inf       | 0.0336794 | 3.7323139      | 1.3988079 | --                                  | --  | --                                                                          | --                                                                                                                    | hypothetical protein<br>POPTR_0001s36270g [Populus<br>trichocarpa]       |
| Potri.001G3<br>91200 | Inf       | 0.7034396 | 4.1334437      | 1.9414137 | --                                  | --  | --                                                                          | Epidermis-specific secreted<br>glycoprotein EP1 (Precursor)<br>GN=EP1 OS=Daucus carota (Wild                          | hypothetical protein<br>POPTR_0001s40180g [Populus                       |

|                      |           |           |           |           |                                                              |      |                                                                      |                                                                                                                                                            |                                                                                  |
|----------------------|-----------|-----------|-----------|-----------|--------------------------------------------------------------|------|----------------------------------------------------------------------|------------------------------------------------------------------------------------------------------------------------------------------------------------|----------------------------------------------------------------------------------|
| Potri.001G4<br>51100 | 2.0700257 | 0.8462961 | 1.6379293 | 1.5689263 | --                                                           | [R]  | Phenylpropanoid biosynthesis (ko00940)                               | carrot) PE=1 SV=1<br>Caffeic acid 3-O-methyltransferase 1<br>GN=OMT1 OS=Populus tremuloides (Quaking aspen) PE=1 SV=1                                      | trichocarpa]<br>eugenol O-methyltransferase family protein [Populus trichocarpa] |
| Potri.002G0<br>25500 | Inf       | 1.4885245 | Inf       | 2.0003781 | Secondary metabolites biosynthesis, transport and catabolism | [Q]  | --                                                                   | Cytochrome P450 83B1<br>GN=At4g31500 OS=Arabidopsis thaliana (Mouse-ear cress) PE=1 SV=1                                                                   | hypothetical protein<br>POPTR_0002s02730g [Populus trichocarpa]                  |
| Potri.003G0<br>87000 | 5.8950565 | 0.4463679 | Inf       | 1.7075820 | --                                                           | --   | --                                                                   | Expansin-like B1 (Precursor)<br>OS=Oryza sativa subsp. japonica (Rice) PE=2 SV=2                                                                           | hypothetical protein<br>POPTR_0003s08530g [Populus trichocarpa]                  |
| Potri.003G1<br>76900 | Inf       | 1.2943108 | 3.5284598 | 1.8326922 | --                                                           | --   | Flavonoid biosynthesis (ko00941); Circadian rhythm - plant (ko04712) | Chalcone synthase 1 GN=CHS1<br>OS=Camellia sinensis (Tea) PE=2 SV=1                                                                                        | naregenin-chalcone synthase family protein [Populus trichocarpa]                 |
| Potri.004G0<br>27400 | Inf       | 0.4390289 | 5.3262516 | 1.2964380 | --                                                           | --   | --                                                                   | G-type lectin S-receptor-like serine/threonine-protein kinase<br>At1g11330 (Precursor)<br>GN=At1g11330 OS=Arabidopsis thaliana (Mouse-ear cress) PE=2 SV=3 | hypothetical protein<br>POPTR_0004s02660g [Populus trichocarpa]                  |
| Potri.004G1<br>29400 | 1.0078797 | 0.7678296 | 4.1129767 | 1.2313974 | --                                                           | [S]  | Taurine and hypotaurine metabolism (ko00430)                         | --                                                                                                                                                         | PREDICTED: 2-aminoethanethiol dioxygenase-like [Populus euphratica]              |
| Potri.004G1<br>82000 | 5.3259395 | 0.9756544 | 2.8264327 | 1.5235248 | General function prediction only                             | [R]  | Amino sugar and nucleotide sugar metabolism (ko00520)                | Endochitinase 1 (Precursor)<br>GN=CHIA1 OS=Theobroma cacao (Cacao) PE=2 SV=1                                                                               | chitinase family protein [Populus trichocarpa]                                   |
| Potri.005G1<br>13700 | 4.1902886 | 0.7546907 | 2.2134780 | 1.1652438 | General function prediction only                             | [QR] | Flavonoid biosynthesis (ko00941)                                     | Naringenin,2-oxoglutarate 3-dioxygenase (Fragment) GN=AN3<br>OS=Petunia hybrida (Petunia) PE=1 SV=1                                                        | unknown [Populus trichocarpa]                                                    |
| Potri.005G1<br>13900 | 2.1253587 | 0.8233892 | 2.0636448 | 1.0595721 | General function prediction only                             | [QR] | Flavonoid biosynthesis (ko00941)                                     | Naringenin,2-oxoglutarate 3-dioxygenase (Fragment) GN=AN3<br>OS=Petunia hybrida (Petunia) PE=1 SV=1                                                        | hypothetical protein<br>POPTR_0005s11600g [Populus trichocarpa]                  |
| Potri.005G2          | 1.7271806 | 0.7557508 | 1.7839176 | 1.3926089 | --                                                           | [V]  | Flavonoid biosynthesis                                               | Dihydroflavonol-4-reductase<br>GN=DFR OS=Vitis vinifera (Grape)                                                                                            | hypothetical protein<br>POPTR_0005s25110g [Populus                               |

|                      |           |           |           |           |                                          |       |                                                                                                                                                                                           |                                                                                                                                       |                                                                                     |
|----------------------|-----------|-----------|-----------|-----------|------------------------------------------|-------|-------------------------------------------------------------------------------------------------------------------------------------------------------------------------------------------|---------------------------------------------------------------------------------------------------------------------------------------|-------------------------------------------------------------------------------------|
| 29500                |           |           |           |           |                                          |       | (ko00941)                                                                                                                                                                                 | PE=1 SV=1                                                                                                                             | trichocarpa]                                                                        |
| Potri.006G0<br>54800 | 2.7495031 | 0.7509783 | 3.7744735 | 1.0523047 | --                                       | [GMW] | --                                                                                                                                                                                        | Probable glucuronoxylan<br>glucuronosyltransferase F8H<br>GN=F8H OS=Arabidopsis thaliana<br>(Mouse-ear cress) PE=2 SV=1               | exostosin family protein [Populus<br>trichocarpa]                                   |
| Potri.006G1<br>17500 | 3.0988778 | 0.4443124 | 3.3747034 | 2.1145921 | --                                       | --    | --                                                                                                                                                                                        | Putative E3 ubiquitin-protein ligase<br>RING1a GN=K9L2.3<br>OS=Arabidopsis thaliana<br>(Mouse-ear cress) PE=1 SV=2                    | hypothetical protein<br>POPTR_0006s11870g [Populus<br>trichocarpa]                  |
| Potri.008G1<br>16500 | 6.7518969 | 0.5894595 | 3.1589102 | 1.2438379 | --                                       | --    | Flavonoid biosynthesis<br>(ko00941)                                                                                                                                                       | Leucoanthocyanidin reductase<br>GN=LAR OS=Desmodium<br>uncinatum (Spanish clover) PE=1<br>SV=1                                        | hypothetical protein<br>POPTR_0008s11540g [Populus<br>trichocarpa]                  |
| Potri.009G1<br>06000 | 6.3219711 | 0.5539113 | 7.6940071 | 1.7652481 | --                                       | --    | --                                                                                                                                                                                        | --                                                                                                                                    | glycine-rich family protein [Populus<br>trichocarpa]                                |
| Potri.010G0<br>55400 | 4.5246317 | 0.8859788 | 4.8137126 | 1.0871733 | Carbohydrate transport and<br>metabolism | [G]   | Glycolysis /<br>Gluconeogenesis<br>(ko00010);; Carbon<br>fixation in photosynthetic<br>organisms (ko00710);;<br>Carbon metabolism<br>(ko01200);; Biosynthesis<br>of amino acids (ko01230) | Glyceraldehyde-3-phosphate<br>dehydrogenase GAPC1, cytosolic<br>GN=T6K12.26 OS=Arabidopsis<br>thaliana (Mouse-ear cress) PE=1<br>SV=2 | glyceraldehyde 3-phosphate<br>dehydrogenase family protein [Populus<br>trichocarpa] |
| Potri.010G0<br>75200 | Inf       | 0.7740902 | Inf       | 1.8389202 | --                                       | --    | --                                                                                                                                                                                        | Glu S. griseus protease inhibitor<br>OS=Momordica charantia (Bitter<br>gourd) PE=1 SV=1                                               | hypothetical protein<br>POPTR_0010s08600g [Populus<br>trichocarpa]                  |
| Potri.011G1<br>58400 | 3.3867026 | 0.2877452 | 5.9055145 | 1.0293191 | Energy production and<br>conversion      | --    | --                                                                                                                                                                                        | Reticuline oxidase-like protein<br>(Precursor) GN=At4g20830<br>OS=Arabidopsis thaliana<br>(Mouse-ear cress) PE=1 SV=2                 | FAD-binding domain-containing family<br>protein [Populus trichocarpa]               |
| Potri.012G1<br>02700 | Inf       | 0.6503972 | Inf       | 1.2237175 | --                                       | --    | Plant hormone signal<br>transduction (ko04075)                                                                                                                                            | Indole-3-acetic acid-induced protein<br>ARG7 GN=ARG7 OS=Vigna<br>radiata var. radiata (Mung bean)<br>PE=2 SV=1                        | hypothetical protein<br>POPTR_0012s10450g [Populus<br>trichocarpa]                  |
| Potri.013G0<br>41600 | 4.5835364 | 0.7339965 | 2.3334849 | 1.0739383 | --                                       | [R]   | --                                                                                                                                                                                        | Win-like protein (Precursor)<br>GN=HEV1 OS=Hevea brasiliensis<br>(Para rubber tree) PE=1 SV=2                                         | HEV1.2 family protein [Populus<br>trichocarpa]                                      |

|                      |                |           |           |           |                                |      |                                                                                      |                                                                                                                      |                                                                                                           |
|----------------------|----------------|-----------|-----------|-----------|--------------------------------|------|--------------------------------------------------------------------------------------|----------------------------------------------------------------------------------------------------------------------|-----------------------------------------------------------------------------------------------------------|
| Potri.013G0<br>65100 | Inf            | 0.2600984 | Inf       | 1.4084307 | --                             | --   | --                                                                                   | GDSL esterase/lipase 1 (Precursor)<br>GN=GLIP1 OS=Arabidopsis<br>thaliana (Mouse-ear cress) PE=1<br>SV=1             | 50 kDa family protein [Populus<br>trichocarpa]                                                            |
| Potri.013G0<br>83600 | 10.875823<br>3 | 0.7879303 | 5.8054838 | 1.1528834 | --                             | --   | Phenylalanine<br>metabolism (ko00360);;<br>Phenylpropanoid<br>biosynthesis (ko00940) | Peroxidase 4<br>{ECO:0000250[UniProtKB:Q42578<br>]} (Precursor) OS=Vitis vinifera<br>(Grape) PE=1 SV=1               | hypothetical protein<br>POPTR_0013s08130g [Populus<br>trichocarpa]                                        |
| Potri.013G0<br>98900 | 6.7995934      | 0.9084790 | 2.8509229 | 1.2049052 | Function unknown               | [R]  | --                                                                                   | DNA-damage-repair/toleration<br>protein DRT100 (Precursor)<br>OS=Arabidopsis thaliana<br>(Mouse-ear cress) PE=2 SV=2 | PREDICTED: probable leucine-rich<br>repeat receptor-like protein kinase<br>At1g35710 [Populus euphratica] |
| Potri.014G1<br>26100 | 2.0219358      | 0.6140248 | 1.7448529 | 1.1093054 | --                             | --   | --                                                                                   | Ethylene-responsive transcription<br>factor RAP2-3 OS=Arabidopsis<br>thaliana (Mouse-ear cress) PE=1<br>SV=2         | hypothetical protein<br>POPTR_0014s12090g [Populus<br>trichocarpa]                                        |
| Potri.019G0<br>57800 | 2.4819992      | 0.6566285 | 3.6418687 | 1.3255992 | --                             | --   | --                                                                                   | Probable chalcone--flavonone<br>isomerase 3 GN=K18I23.7<br>OS=Arabidopsis thaliana<br>(Mouse-ear cress) PE=1 SV=1    | hypothetical protein<br>POPTR_0019s08610g [Populus<br>trichocarpa]                                        |
| Potri.019G0<br>93800 | Inf            | 0.5319319 | Inf       | 2.1450749 | --                             | [R]  | Amino sugar and<br>nucleotide sugar<br>metabolism (ko00520)                          | Endochitinase PR4 (Precursor)<br>GN=CHI4 OS=Phaseolus vulgaris<br>(Kidney bean) PE=2 SV=1                            | hypothetical protein<br>POPTR_0019s12360g [Populus<br>trichocarpa]                                        |
| Potri.001G0<br>51500 | Inf            | 1.8630759 | Inf       | 2.1823663 | --                             | --   | Flavonoid biosynthesis<br>(ko00941);; Circadian<br>rhythm - plant (ko04712)          | Chalcone synthase 1 GN=CHS1<br>OS=Camellia sinensis (Tea) PE=2<br>SV=1                                               | naregenin-chalcone synthase family<br>protein [Populus trichocarpa]                                       |
| Potri.001G2<br>82100 | Inf            | 1.9040586 | Inf       | 1.9601873 | --                             | [GC] | --                                                                                   | UDP-glycosyltransferase 87A2<br>GN=UGT87A2 OS=Arabidopsis<br>thaliana (Mouse-ear cress) PE=1<br>SV=1                 | hypothetical protein<br>POPTR_0001s28890g [Populus<br>trichocarpa]                                        |
| Potri.001G3<br>34800 | Inf            | 1.0205569 | 2.5690344 | 1.3119131 | --                             | [R]  | --                                                                                   | Kelch repeat-containing protein<br>At3g27220 GN=At3g27220<br>OS=Arabidopsis thaliana<br>(Mouse-ear cress) PE=2 SV=1  | hypothetical protein<br>POPTR_0001s34240g [Populus<br>trichocarpa]                                        |
| Potri.002G0<br>70100 | 9.4406502      | 1.7498587 | 2.9346849 | 2.1364238 | Cell<br>wall/membrane/envelope | --   | --                                                                                   | Extensin (Precursor) OS=Daucus<br>carota (Wild carrot) PE=2 SV=1                                                     | PREDICTED: extensin-3 isoform X2<br>[Populus euphratica]                                                  |

|                      |           |           |           |           |                                                                    | biogenesis |                                                                                      |                                                                                                                                |                                                                       |  |
|----------------------|-----------|-----------|-----------|-----------|--------------------------------------------------------------------|------------|--------------------------------------------------------------------------------------|--------------------------------------------------------------------------------------------------------------------------------|-----------------------------------------------------------------------|--|
| Potri.002G1<br>08400 | 1.3531099 | 1.1326605 | 1.3312523 | 1.5365030 | --                                                                 | --         | --                                                                                   | Transcription factor bHLH93<br>GN=K21L13.16 OS=Arabidopsis<br>thaliana (Mouse-ear cress) PE=1<br>SV=1                          | hypothetical protein<br>POPTR_0002s10910g [Populus<br>trichocarpa]    |  |
| Potri.004G0<br>30700 | 2.6826523 | 1.0044137 | 2.5347575 | 1.6810266 | --                                                                 | [V]        | Flavonoid biosynthesis<br>(ko00941)                                                  | Anthocyanidin reductase<br>GN=T13M11.8 OS=Arabidopsis<br>thaliana (Mouse-ear cress) PE=1<br>SV=2                               | Leucoanthocyanidin reductase family<br>protein [Populus trichocarpa]  |  |
| Potri.004G0<br>41000 | 3.1196187 | 1.4307615 | 3.0130025 | 1.9229099 | --                                                                 | --         | --                                                                                   | CBS domain-containing protein<br>CBSX5 GN=CBSX5<br>OS=Arabidopsis thaliana<br>(Mouse-ear cress) PE=2 SV=2                      | hypothetical protein<br>POPTR_0004s04120g [Populus<br>trichocarpa]    |  |
| Potri.004G1<br>14300 | 3.8255664 | 1.7673162 | 3.5012075 | 1.3532828 | --                                                                 | --         | --                                                                                   | Vegetative cell wall protein gp1<br>(Precursor) GN=GPI<br>OS=Chlamydomonas reinhardtii<br>(Chlamydomonas smithii) PE=1<br>SV=1 | hypothetical protein<br>POPTR_0004s11300g [Populus<br>trichocarpa]    |  |
| Potri.005G1<br>35300 | 7.8024684 | 2.5573549 | 3.6297763 | 1.9034604 | --                                                                 | --         | Phenylalanine<br>metabolism (ko00360);;<br>Phenylpropanoid<br>biosynthesis (ko00940) | Peroxidase 10 (Precursor)<br>GN=F14J22.19 OS=Arabidopsis<br>thaliana (Mouse-ear cress) PE=1<br>SV=1                            | peroxidase family protein [Populus<br>trichocarpa]                    |  |
| Potri.005G1<br>88300 | Inf       | 1.2535870 | Inf       | 1.8046078 | --                                                                 | --         | --                                                                                   | Pathogen-related protein<br>OS=Hordeum vulgare (Barley)<br>PE=2 SV=2                                                           | hypothetical protein<br>POPTR_0005s21070g [Populus<br>trichocarpa]    |  |
| Potri.005G1<br>88400 | Inf       | 1.0101648 | Inf       | 1.4140165 | --                                                                 | --         | --                                                                                   | Pathogen-related protein<br>OS=Hordeum vulgare (Barley)<br>PE=2 SV=2                                                           | putative pathogenesis-related family<br>protein [Populus trichocarpa] |  |
| Potri.005G1<br>90100 | Inf       | 1.8835820 | 3.4316353 | 2.6992261 | Cell<br>wall/membrane/envelope<br>biogenesis                       | --         | --                                                                                   | Extensin (Precursor) OS=Daucus<br>carota (Wild carrot) PE=2 SV=1                                                               | PREDICTED: extensin isoform X4<br>[Populus euphratica]                |  |
| Potri.008G1<br>74900 | 6.7838984 | 1.0575690 | 4.0313597 | 1.3199862 | Posttranslational<br>modification, protein<br>turnover, chaperones | [O]        | Glutathione metabolism<br>(ko00480)                                                  | Glutathione transferase GST 23<br>OS=Zea mays (Maize) PE=2 SV=1                                                                | hypothetical protein<br>POPTR_0008s17500g [Populus<br>trichocarpa]    |  |
| Potri.010G1          | 6.1888506 | 1.5620878 | 3.4633578 | 1.7749506 | Carbohydrate transport and                                         | --         | --                                                                                   | Glucan endo-1,3-beta-glucosidase<br>major form (Precursor) GN=HGN1                                                             | Glucan endo-1 family protein [Populus                                 |  |

|                      |                |           |           |           |                                     |       |                                                                                      |  |                                                                                                                               |                                                                      |
|----------------------|----------------|-----------|-----------|-----------|-------------------------------------|-------|--------------------------------------------------------------------------------------|--|-------------------------------------------------------------------------------------------------------------------------------|----------------------------------------------------------------------|
| 42800                |                |           |           |           | metabolism                          |       |                                                                                      |  | OS=Hevea brasiliensis (Para rubber tree) PE=1 SV=2                                                                            | trichocarpa]                                                         |
| Potri.010G2<br>08600 | 5.1610559      | 1.1122946 | 6.6409674 | 1.0074689 | --                                  | --    | --                                                                                   |  | Transcription factor bHLH110<br>GN=T22C5.11 OS=Arabidopsis<br>thaliana (Mouse-ear cress) PE=2<br>SV=2                         | PREDICTED: transcription factor<br>bHLH123-like [Populus euphratica] |
| Potri.013G0<br>00500 | 4.3660183      | 1.6971185 | 4.8674382 | 1.6783155 | --                                  | --    | --                                                                                   |  | Germin-like protein subfamily 2<br>member 1 (Precursor) GN=F14J9.22<br>OS=Arabidopsis thaliana<br>(Mouse-ear cress) PE=2 SV=2 | rhicadhesin receptor family protein<br>[Populus trichocarpa]         |
| Potri.014G0<br>19200 | 2.9214638      | 1.5888717 | 1.7113102 | 2.2279907 | --                                  | [C]   | --                                                                                   |  | Cytochrome b5 OS=Nicotiana<br>tabacum (Common tobacco) PE=2<br>SV=1                                                           | hypothetical protein<br>POPTR_0014s01940g [Populus<br>trichocarpa]   |
| Potri.014G1<br>08800 | 6.7431254      | 1.2725427 | 7.4405966 | 1.8939204 | --                                  | --    | --                                                                                   |  | --                                                                                                                            | hypothetical protein<br>POPTR_0014s10440g [Populus<br>trichocarpa]   |
| Potri.014G1<br>28200 | 1.2271486      | 1.1407659 | 1.7116595 | 1.4705985 | --                                  | [KLO] | Base excision repair<br>(ko03410)                                                    |  | Poly [ADP-ribose] polymerase 2<br>GN=T14P8.19 OS=Arabidopsis<br>thaliana (Mouse-ear cress) PE=2<br>SV=1                       | Poly [ADP-ribose] polymerase family<br>protein [Populus trichocarpa] |
| Potri.016G1<br>02100 | 5.1647480      | 1.3135997 | 7.4741765 | 1.0095374 | General function prediction<br>only | [R]   | --                                                                                   |  | Aldo-keto reductase family 4<br>member C9 GN=AKR4C9<br>OS=Arabidopsis thaliana<br>(Mouse-ear cress) PE=1 SV=1                 | hypothetical protein<br>POPTR_0016s10390g [Populus<br>trichocarpa]   |
| Potri.016G1<br>32700 | 10.304546<br>9 | 1.1286335 | 6.3718147 | 1.6302065 | --                                  | --    | Phenylalanine<br>metabolism (ko00360);;<br>Phenylpropanoid<br>biosynthesis (ko00940) |  | Cationic peroxidase 1 (Precursor)<br>GN=PNC1 OS=Arachis hypogaea<br>(Peanut) PE=1 SV=2                                        | hypothetical protein<br>POPTR_0016s14030g [Populus<br>trichocarpa]   |
| Potri.017G1<br>40900 | 6.5706621      | 1.7919022 | 2.4855520 | 2.2557816 | --                                  | --    | Glutathione metabolism<br>(ko00480)                                                  |  | --                                                                                                                            | hypothetical protein<br>POPTR_0017s01880g [Populus<br>trichocarpa]   |
| Potri.017G1<br>51900 | 3.3297647      | 1.1966605 | 3.7053592 | 1.4858123 | --                                  | [EH]  | Glycolysis /<br>Gluconeogenesis<br>(ko00010)                                         |  | Pyruvate decarboxylase 1<br>GN=PDC1 OS=Pisum sativum<br>(Garden pea) PE=2 SV=1                                                | hypothetical protein<br>POPTR_0017s00800g [Populus<br>trichocarpa]   |
| Potri.018G1          | Inf            | 1.8141010 | 3.7047991 | 1.6032880 | --                                  | [G]   | Galactose metabolism<br>(ko00052);; Glycerolipid<br>metabolism (ko00561);;           |  | Alpha-galactosidase (Precursor)<br>OS=Coffea arabica (Arabian coffee)                                                         | hypothetical protein<br>POPTR_0018s14920g [Populus                   |



|                  |           |           |            |           |    |     |    |                                                                                                                                                      |                                                              |              |
|------------------|-----------|-----------|------------|-----------|----|-----|----|------------------------------------------------------------------------------------------------------------------------------------------------------|--------------------------------------------------------------|--------------|
| 52200            |           |           |            |           |    |     |    | Sphingolipid metabolism (ko00600);; Glycosphingolipid biosynthesis - globoseries (ko00603)                                                           | PE=1 SV=1                                                    | trichocarpa] |
| Potri.019G128600 | 1.4512704 | 1.3981207 | 1.4852795  | 1.0124916 | -- | [R] | -- | Probable serine/threonine-protein kinase WNK4 GN=WNK4 OS=Arabidopsis thaliana (Mouse-ear cress) PE=1 SV=1                                            | hypothetical protein POPTR_0019s14910g [Populus trichocarpa] |              |
| Potri.T021700    | 3.0955456 | 1.5511470 | Inf        | 2.0185994 | -- | --  | -- | G-type lectin S-receptor-like serine/threonine-protein kinase At4g27290 (Precursor) GN=At4g27290 OS=Arabidopsis thaliana (Mouse-ear cress) PE=3 SV=4 | hypothetical protein POPTR_0011s12970g [Populus trichocarpa] |              |
| Potri.T167100    | 6.1926682 | 1.4499330 | 3.2240538  | 1.7643513 | -- | --  | -- | Glucan endo-1,3-beta-glucosidase major form (Precursor) GN=HGN1 OS=Hevea brasiliensis (Para rubber tree) PE=1 SV=2                                   | hypothetical protein POPTR_0010s15320g [Populus trichocarpa] |              |
| --               | Inf       | 1.8963181 | --         | 3.2227618 | -- | --  | -- | --                                                                                                                                                   | Uncharacterized protein isoform 3, partial [Theobroma cacao] |              |
| --               | 4.7596084 | 1.4590402 | 2.3294568  | 1.6405161 | -- | --  | -- | --                                                                                                                                                   | --                                                           |              |
| Potri.001G019700 | 7.5811629 | 2.4824420 | 3.0581332  | 3.6503889 | -- | --  | -- | Extensin (Precursor) OS=Daucus carota (Wild carrot) PE=2 SV=1                                                                                        | hypothetical protein POPTR_0001s05720g [Populus trichocarpa] |              |
| Potri.001G097300 | 4.4568074 | 3.6672232 | -0.1634970 | 4.0998106 | -- | [R] | -- | Aluminum-activated malate transporter 9 GN=ALMT9 OS=Arabidopsis thaliana (Mouse-ear cress) PE=2 SV=1                                                 | hypothetical protein POPTR_0001s10080g [Populus trichocarpa] |              |
| Potri.001G102400 | 4.8782026 | 1.4344343 | 1.3596338  | 1.8574515 | -- | --  | -- | Osmotin-like protein OSM34 (Precursor) GN=OSM34 OS=Arabidopsis thaliana (Mouse-ear cress) PE=2 SV=2                                                  | hypothetical protein POPTR_0001s09570g [Populus trichocarpa] |              |
| Potri.001G107600 | 3.2056890 | 1.7841821 | 0.8852815  | 1.8342008 | -- | --  | -- | Osmotin-like protein OSM34 (Precursor) GN=OSM34 OS=Arabidopsis thaliana (Mouse-ear cress) PE=2 SV=2                                                  | P21 family protein [Populus trichocarpa]                     |              |

|                      |           |           |                |           |                                                                    |      |                                                                                             |                                                                                                                      |                                                                            |
|----------------------|-----------|-----------|----------------|-----------|--------------------------------------------------------------------|------|---------------------------------------------------------------------------------------------|----------------------------------------------------------------------------------------------------------------------|----------------------------------------------------------------------------|
| Potri.001G1<br>07800 | Inf       | 3.3747407 | --             | 5.2887831 | --                                                                 | --   | --                                                                                          | Thaumatococcus-like protein (Precursor)<br>GN=tlp OS=Actinidia deliciosa<br>(Kiwi) PE=1 SV=2                         | P21 family protein [Populus<br>trichocarpa]                                |
| Potri.001G1<br>40700 | Inf       | 1.8403397 | 2.4640513      | 2.5237492 | --                                                                 | [V]  | --                                                                                          | Cinnamoyl-CoA reductase 1<br>GN=T24D18.5 OS=Arabidopsis<br>thaliana (Mouse-ear cress) PE=1<br>SV=1                   | hypothetical protein<br>POPTR_0001s02320g [Populus<br>trichocarpa]         |
| Potri.001G2<br>50800 | 1.6295795 | 1.5447246 | -0.155823<br>4 | 1.6980408 | --                                                                 | [O]  | --                                                                                          | RING-H2 finger protein ATL66<br>GN=ATL66 OS=Arabidopsis<br>thaliana (Mouse-ear cress) PE=2<br>SV=1                   | hypothetical protein<br>POPTR_0001s25790g [Populus<br>trichocarpa]         |
| Potri.001G2<br>70800 | 3.8345671 | 2.0047061 | Inf            | 3.6836019 | Secondary metabolites<br>biosynthesis, transport and<br>catabolism | [QI] | --                                                                                          | Cytochrome P450 87A3<br>GN=OSJNBa0088122.16 OS=Oryza<br>sativa subsp. japonica (Rice) PE=2<br>SV=3                   | hypothetical protein<br>POPTR_0001s27770g [Populus<br>trichocarpa]         |
| Potri.001G2<br>88600 | Inf       | 1.8972541 | -0.226186<br>7 | 1.8092069 | Function unknown                                                   | [S]  | Plant hormone signal<br>transduction (ko04075);;<br>Plant-pathogen<br>interaction (ko04626) | Pathogenesis-related protein 1<br>(Precursor) GN=At2g14610<br>OS=Arabidopsis thaliana<br>(Mouse-ear cress) PE=1 SV=1 | Pathogenesis-related family protein<br>[Populus trichocarpa]               |
| Potri.003G1<br>19100 | Inf       | 1.9252558 | 1.5631216      | 2.6126004 | --                                                                 | [QR] | Flavonoid biosynthesis<br>(ko00941)                                                         | Leucoanthocyanidin dioxygenase<br>GN=ANS OS=Malus domestica<br>(Apple) PE=2 SV=1                                     | Leucoanthocyanidin dioxygenase<br>family protein [Populus trichocarpa]     |
| Potri.003G1<br>47600 | 4.0527738 | 2.7040455 | --             | 2.6895071 | --                                                                 | --   | --                                                                                          | Endoglucanase 1 (Precursor)<br>GN=CEL1 OS=Persea americana<br>(Avocado) PE=2 SV=1                                    | endo-1,4-beta-glucanase [Populus<br>trichocarpa]                           |
| Potri.004G0<br>00400 | Inf       | 2.5978676 | --             | 4.9636728 | --                                                                 | --   | --                                                                                          | Miraculin (Precursor)<br>OS=Synsepalum dulcificum<br>(Miracle fruit) PE=1 SV=3                                       | truncated Kunitz trypsin inhibitor<br>family protein [Populus trichocarpa] |
| Potri.004G0<br>54100 | 1.9988037 | 1.1591173 | 0.2063910      | 1.5157118 | --                                                                 | [EH] | Glycolysis /<br>Gluconeogenesis<br>(ko00010)                                                | Pyruvate decarboxylase 1<br>GN=PDC1 OS=Pisum sativum<br>(Garden pea) PE=2 SV=1                                       | pyruvate decarboxylase family protein<br>[Populus trichocarpa]             |
| Potri.004G1<br>29700 | 3.0490893 | 1.2349875 | 0.4364916      | 1.4607174 | Carbohydrate transport and<br>metabolism                           | [G]  | Glycolysis /<br>Gluconeogenesis<br>(ko00010);; Galactose<br>metabolism (ko00052)            | --                                                                                                                   | hypothetical protein<br>POPTR_0004s13470g [Populus<br>trichocarpa]         |

|                      |           |           |                |           |                                                                    |      |                                                                                                                                                                    |                                                                                                                                 |                                                                     |
|----------------------|-----------|-----------|----------------|-----------|--------------------------------------------------------------------|------|--------------------------------------------------------------------------------------------------------------------------------------------------------------------|---------------------------------------------------------------------------------------------------------------------------------|---------------------------------------------------------------------|
| Potri.004G1<br>36000 | Inf       | 2.3803442 | -0.144631<br>0 | 3.3745880 | --                                                                 | --   | --                                                                                                                                                                 | Dehydration-responsive protein<br>RD22 (Precursor) GN=RD22<br>OS=Arabidopsis thaliana<br>(Mouse-ear cress) PE=2 SV=1            | hypothetical protein<br>POPTR_0129s00200g [Populus<br>trichocarpa]  |
| Potri.004G2<br>33500 | Inf       | 1.7203601 | 1.7909313      | 1.8871679 | --                                                                 | [R]  | --                                                                                                                                                                 | Hexose carrier protein HEX6<br>GN=HEX6 OS=Ricinus communis<br>(Castor bean) PE=2 SV=1                                           | hypothetical protein<br>POPTR_0004s24170g [Populus<br>trichocarpa]  |
| Potri.005G0<br>48400 | 1.0980868 | 1.5700669 | 1.6561078      | 1.5487506 | Amino acid transport and<br>metabolism                             | [E]  | Cysteine and methionine<br>metabolism (ko00270);;<br>Sulfur metabolism<br>(ko00920);; Carbon<br>metabolism (ko01200);;<br>Biosynthesis of amino<br>acids (ko01230) | Cysteine synthase OS=Citrullus<br>lanatus (Watermelon) PE=1 SV=1                                                                | O-acetylserine (thiol)lyase family<br>protein [Populus trichocarpa] |
| Potri.005G2<br>03200 | 5.1747737 | 1.3685843 | 0.5757906      | 1.1310831 | --                                                                 | --   | --                                                                                                                                                                 | Probable WRKY transcription factor<br>28 GN=WRKY28 OS=Arabidopsis<br>thaliana (Mouse-ear cress) PE=2<br>SV=1                    | hypothetical protein<br>POPTR_0005s22480g [Populus<br>trichocarpa]  |
| Potri.006G2<br>12000 | Inf       | 1.4852158 | --             | 3.2699240 | --                                                                 | --   | --                                                                                                                                                                 | Inhibitor of trypsin and hageman<br>factor OS=Cucurbita maxima<br>(Pumpkin) PE=1 SV=1                                           | hypothetical protein<br>POPTR_0006s22860g [Populus<br>trichocarpa]  |
| Potri.007G1<br>03400 | Inf       | 1.2467986 | --             | 1.8412255 | --                                                                 | [R]  | --                                                                                                                                                                 | --                                                                                                                              | hypothetical protein<br>POPTR_0007s04400g [Populus<br>trichocarpa]  |
| Potri.007G1<br>11600 | Inf       | 1.8468562 | --             | 2.4487250 | --                                                                 | --   | --                                                                                                                                                                 | Alpha-amylase/subtilisin inhibitor<br>(Precursor)<br>GN=OSJNBa0038O10.14<br>OS=Oryza sativa subsp. japonica<br>(Rice) PE=1 SV=2 | hypothetical protein<br>POPTR_0007s03640g [Populus<br>trichocarpa]  |
| Potri.008G1<br>06400 | 5.6029566 | 1.8493370 | 2.3001769      | 2.7049131 | --                                                                 | [R]  | alpha-Linolenic acid<br>metabolism (ko00592)                                                                                                                       | Alpha-dioxygenase 1 (Precursor)<br>GN=T13O15.6 OS=Arabidopsis<br>thaliana (Mouse-ear cress) PE=1<br>SV=1                        | putative alpha-dioxygenase family<br>protein [Populus trichocarpa]  |
| Potri.009G0<br>64900 | Inf       | 1.2093849 | Inf            | 1.9113764 | Secondary metabolites<br>biosynthesis, transport and<br>catabolism | [QI] | --                                                                                                                                                                 | Cytochrome P450 87A3<br>GN=OSJNBa0088I22.16 OS=Oryza<br>sativa subsp. japonica (Rice) PE=2<br>SV=3                              | PREDICTED: cytochrome P450<br>87A3-like [Populus euphratica]        |

|                      |           |           |           |           |                                  |      |                                                                                             |                                                                                                                   |                                                                        |
|----------------------|-----------|-----------|-----------|-----------|----------------------------------|------|---------------------------------------------------------------------------------------------|-------------------------------------------------------------------------------------------------------------------|------------------------------------------------------------------------|
| Potri.011G0<br>25400 | Inf       | 3.6142033 | 1.3262892 | 3.1790549 | --                               | --   | Pentose and glucuronate interconversions (ko00040); Starch and sucrose metabolism (ko00500) | Bifunctional pectinesterase 18/rRNA N-glycosylase (Precursor) OS=Arabidopsis thaliana (Mouse-ear cress) PE=1 SV=3 | pectin methylesterase family protein [Populus trichocarpa]             |
| Potri.011G1<br>58100 | Inf       | 3.5975362 | --        | 4.5316914 | Energy production and conversion | --   | --                                                                                          | Cannabidiolic acid synthase-like 1 (Precursor) GN=CBIDAS2 OS=Cannabis sativa (Hemp) PE=2 SV=1                     | PREDICTED: cannabidiolic acid synthase-like 1 [Populus euphratica]     |
| Potri.011G1<br>62800 | 2.2602463 | 1.7339461 | 2.6177524 | 2.2201507 | Energy production and conversion | --   | --                                                                                          | Tetrahydrocannabinolic acid synthase (Precursor) OS=Cannabis sativa (Hemp) PE=1 SV=1                              | hypothetical protein POPTR_0011s16560g [Populus trichocarpa]           |
| Potri.012G0<br>47300 | 2.1617667 | 2.0094697 | 2.2743760 | 2.1312926 | --                               | [IR] | Glycerophospholipid metabolism (ko00564)                                                    | Phosphomethylethanolamine N-methyltransferase OS=Arabidopsis thaliana (Mouse-ear cress) PE=2 SV=2                 | hypothetical protein POPTR_0012s044902g, partial [Populus trichocarpa] |
| Potri.013G1<br>54400 | Inf       | 1.9471322 | 7.2189038 | 2.9804165 | --                               | --   | Phenylalanine metabolism (ko00360); Phenylpropanoid biosynthesis (ko00940)                  | Cationic peroxidase 1 (Precursor) GN=PNC1 OS=Arachis hypogaea (Peanut) PE=1 SV=2                                  | peroxidase family protein [Populus trichocarpa]                        |
| Potri.014G1<br>18400 | 3.0759103 | 1.7476758 | 1.5252334 | 2.4815588 | --                               | --   | Galactose metabolism (ko00052)                                                              | Stachyose synthase (Precursor) GN=STS1 OS=Pisum sativum (Garden pea) PE=1 SV=1                                    | stachyose synthase family protein [Populus trichocarpa]                |
| Potri.015G0<br>06000 | 2.8760124 | 1.4214324 | 0.4292026 | 1.7876111 | Defense mechanisms               | [Q]  | --                                                                                          | Pleiotropic drug resistance protein 3 GN=PDR3 OS=Nicotiana tabacum (Common tobacco) PE=2 SV=1                     | hypothetical protein POPTR_0015s00840g [Populus trichocarpa]           |
| Potri.015G1<br>20900 | Inf       | 1.9087612 | Inf       | 2.7313057 | --                               | [I]  | Steroid biosynthesis (ko00100); Sesquiterpenoid and triterpenoid biosynthesis (ko00909)     | Squalene monooxygenase OS=Panax ginseng (Korean ginseng) PE=2 SV=1                                                | hypothetical protein POPTR_0015s15430g [Populus trichocarpa]           |
| Potri.016G0<br>57400 | Inf       | 2.1152896 | 2.3229854 | 2.9381059 | --                               | --   | --                                                                                          | Glucan endo-1,3-beta-glucosidase, basic isoform (Precursor) GN=GNS1 OS=Prunus persica (Peach) PE=3 SV=1           | hypothetical protein POPTR_0016s05780g [Populus trichocarpa]           |
| Potri.016G0<br>79100 | 9.1656480 | 1.1056528 | Inf       | 2.0341103 | --                               | --   | --                                                                                          | Inhibitor of trypsin and hageman factor OS=Cucurbita maxima (Pumpkin) PE=1 SV=1                                   | hypothetical protein POPTR_0016s07990g [Populus trichocarpa]           |

|                  |           |           |            |           |                                  |      |                                                                             |                                                                                                               |                                                              |
|------------------|-----------|-----------|------------|-----------|----------------------------------|------|-----------------------------------------------------------------------------|---------------------------------------------------------------------------------------------------------------|--------------------------------------------------------------|
| Potri.018G066900 | 3.5107343 | 3.0288962 | 2.0638928  | 3.7253336 | --                               | [R]  | --                                                                          | Transcription initiation factor TFIID subunit 15 GN=TAF15 OS=Arabidopsis thaliana (Mouse-ear cress) PE=1 SV=1 | hypothetical protein POPTR_0018s06970g [Populus trichocarpa] |
| Potri.018G129400 | Inf       | 2.8683207 | --         | 4.2498704 | --                               | --   | --                                                                          | Blue copper protein (Precursor) GN=F5O24.120 OS=Arabidopsis thaliana (Mouse-ear cress) PE=1 SV=2              | hypothetical protein POPTR_0018s12950g [Populus trichocarpa] |
| Potri.019G117500 | Inf       | 1.1281051 | --         | 4.4313875 | --                               | --   | --                                                                          | --                                                                                                            | hypothetical protein POPTR_0019s14010g [Populus trichocarpa] |
| Potri.T060100    | 2.9469202 | 1.3499023 | -0.7622789 | 1.2915060 | General function prediction only | [RV] | Pyruvate metabolism (ko00620)                                               | Protein DJ-1 homolog D GN=DJ1D OS=Arabidopsis thaliana (Mouse-ear cress) PE=1 SV=1                            | hypothetical protein POPTR_0017s01530g [Populus trichocarpa] |
| Potri.T111200    | Inf       | 1.6419463 | --         | 3.4029646 | --                               | --   | --                                                                          | Major allergen Pru ar 1 OS=Prunus armeniaca (Apricot) PE=1 SV=1                                               | hypothetical protein POPTR_0016s04580g [Populus trichocarpa] |
| Potri.T163000    | Inf       | 1.6190942 | --         | 3.6084078 | --                               | --   | Phenylalanine metabolism (ko00360);; Phenylpropanoid biosynthesis (ko00940) | Lignin-forming anionic peroxidase (Precursor) OS=Nicotiana sylvestris (Wood tobacco) PE=2 SV=1                | hypothetical protein POPTR_0010s24340g [Populus trichocarpa] |
| Potri.T175200    | Inf       | 1.9411482 | -0.3844577 | 2.0846357 | General function prediction only | [R]  | Amino sugar and nucleotide sugar metabolism (ko00520)                       | Endochitinase A2 (Precursor) GN=CHI2 OS=Pisum sativum (Garden pea) PE=1 SV=2                                  | hypothetical protein POPTR_0790s00210g [Populus trichocarpa] |

---

**Table S2.** Up-regulated and down-regulated genes of auxin signaling pathways related to AR induction at different time points.

| Gene Name | Gene_ID          | #18-12h_vs_#18-0h_log2FC | #18-24h_vs_#18-12h_log2FC | #18-48h_vs_#18-24h_log2FC | WT-12h_vs_WT-0h_log2FC | WT-24h_vs_WT-12h_log2FC | WT-48h_vs_WT-24h_log2FC | COG_class_annotation                                         | KOG_class_annotation                                         | Swissprot_annotation                                                                                                        | nr_annotation                                                                               |
|-----------|------------------|--------------------------|---------------------------|---------------------------|------------------------|-------------------------|-------------------------|--------------------------------------------------------------|--------------------------------------------------------------|-----------------------------------------------------------------------------------------------------------------------------|---------------------------------------------------------------------------------------------|
| 26S-4     | Potri.015G007800 | 3.8075524                | -0.3731043                | -0.1846246                | 4.3794750              | -0.0593056              | -0.9108942              | Posttranslational modification, protein turnover, chaperones | Posttranslational modification, protein turnover, chaperones | 26S protease regulatory subunit 4 homolog GN=P0034A04.112 OS=Oryza sativa subsp. japonica (Rice) PE=2 SV=2                  | hypothetical protein POPTR_0015s01020g [Populus trichocarpa]                                |
| 26S-6A    | Potri.015G067400 | 2.7179564                | -0.1835535                | -0.6850570                | 2.9401010              | -0.3820875              | -0.3630234              | Posttranslational modification, protein turnover, chaperones | Posttranslational modification, protein turnover, chaperones | 26S protease regulatory subunit 6A homolog OS=Oryza sativa subsp. japonica (Rice) PE=2 SV=2                                 | hypothetical protein POPTR_0015s07870g [Populus trichocarpa]                                |
| 26S-6B    | Potri.006G029100 | 2.2654202                | 0.1116214                 | 0.1215391                 | 2.3411286              | -0.0064829              | 0.4270731               | Posttranslational modification, protein turnover, chaperones | Posttranslational modification, protein turnover, chaperones | 26S protease regulatory subunit 6B homolog {ECO:0000250 UniProtKB:P54778} OS=Helianthus annuus (Common sunflower) PE=1 SV=1 | PREDICTED: 26S protease regulatory subunit 6B homolog [Populus euphratica]                  |
| 26S-8     | Potri.007G020800 | 4.1192802                | -0.7251905                | -0.7736124                | 1.8541792              | -0.5536717              | -0.9447426              | Posttranslational modification, protein turnover, chaperones | Posttranslational modification, protein turnover, chaperones | 26S protease regulatory subunit 8 homolog B GN=F28116.150 OS=Arabidopsis thaliana (Mouse-ear cress) PE=1 SV=1               | PREDICTED: uncharacterized AAA domain-containing protein C31G5.19-like [Populus euphratica] |
| ARF7.3    | Potri.018G145800 | 1.0428527                | -0.8961010                | -0.1168651                | 1.6167895              | -0.6898670              | 0.1283382               | --                                                           | --                                                           | Auxin response factor 19 OS=Oryza sativa subsp. japonica (Rice) PE=2 SV=2                                                   | auxin response factor 2 family protein [Populus trichocarpa]                                |
| CUL1      | Potri.008G224100 | 2.5184053                | 0.1812459                 | -0.3422988                | 2.0287016              | 0.1503999               | -0.2933289              | Posttranslational modification, protein turnover, chaperones | Cell cycle control, cell division, chromosome partitioning   | Cullin-1 GN=CUL1 OS=Arabidopsis thaliana (Mouse-ear cress) PE=1 SV=1                                                        | hypothetical protein POPTR_0008s21900g [Populus trichocarpa]                                |
| GH3.1     | Potri.007G050300 | 10.5739116               | 0.3960134                 | 0.1710195                 | 9.1831844              | 1.5729515               | 0.5824774               | --                                                           | --                                                           | Probable indole-3-acetic acid-amido synthetase GH3.1 GN=GH3.1 OS=Arabidopsis thaliana (Mouse-ear cress) PE=2                | hypothetical protein POPTR_0007s10350g [Populus trichocarpa]                                |

SV=1

|            |                      |               |            |                |            |            |            |                                                              |                                                              |                                                                                                                             |                                                                    |
|------------|----------------------|---------------|------------|----------------|------------|------------|------------|--------------------------------------------------------------|--------------------------------------------------------------|-----------------------------------------------------------------------------------------------------------------------------|--------------------------------------------------------------------|
| GH3.6      | Potri.014G<br>136800 | 3.182275<br>2 | 0.2004431  | -0.81265<br>00 | 1.9730494  | 0.0739825  | -0.1110947 | --                                                           | --                                                           | Probable indole-3-acetic acid-amido synthetase GH3.6<br>GN=OJ1607_F09.5 OS=Oryza sativa subsp. japonica (Rice)<br>PE=2 SV=2 | hypothetical protein<br>POPTR_0014s13260g<br>[Populus trichocarpa] |
| ARF5.2     | Potri.005G<br>236700 | 3.047627<br>6 | -0.2173386 | -0.31448<br>79 | -0.8075387 | -0.2581722 | -0.4974767 | --                                                           | --                                                           | Auxin response factor 5<br>GN=F6F9.10 OS=Arabidopsis thaliana (Mouse-ear cress) PE=1<br>SV=3                                | PREDICTED: auxin response factor 5-like<br>[Populus euphratica]    |
| ARF5.1     | Potri.002G<br>024700 | 1.599597<br>3 | 0.0117308  | 0.117889<br>4  | 1.4534820  | -0.2245477 | 0.1929358  | --                                                           | --                                                           | Auxin response factor 5<br>GN=F6F9.10 OS=Arabidopsis thaliana (Mouse-ear cress) PE=1<br>SV=3                                | hypothetical protein<br>POPTR_0002s02630g<br>[Populus trichocarpa] |
| P450-705A5 | Potri.001G<br>270900 | 2.860387<br>8 | 1.2931721  | 0.534060<br>0  | 0.7853223  | 0.9728606  | 0.7230789  | Secondary metabolites biosynthesis, transport and catabolism | Secondary metabolites biosynthesis, transport and catabolism | Cytochrome P450 705A5<br>GN=MDN11.4 OS=Arabidopsis thaliana (Mouse-ear cress) PE=2<br>SV=1                                  | hypothetical protein<br>POPTR_0001s27780g<br>[Populus trichocarpa] |
| P450-81D11 | Potri.014G<br>020600 | Inf           | 0.7894733  | 2.306420<br>5  | 1.2012081  | 0.7589166  | 0.8225278  | Secondary metabolites biosynthesis, transport and catabolism | Secondary metabolites biosynthesis, transport and catabolism | Cytochrome P450 81D11<br>GN=CYP81D11<br>OS=Arabidopsis thaliana (Mouse-ear cress) PE=2 SV=1                                 | hypothetical protein<br>POPTR_0458s00200g<br>[Populus trichocarpa] |
| P450-81E8  | Potri.014G<br>020400 | 2.598106<br>5 | -0.2523913 | 0.303546<br>2  | 4.2525020  | -0.5865136 | 0.1966683  | Secondary metabolites biosynthesis, transport and catabolism | Secondary metabolites biosynthesis, transport and catabolism | Cytochrome P450 81E8<br>{ECO:0000303 PubMed:14617078} OS=Medicago truncatula (Barrel medic) PE=2 SV=1                       | cytochrome P450 family protein [Populus trichocarpa]               |
| P450-82A3  | Potri.014G<br>037400 | Inf           | 0.8113303  | 0.542836<br>9  | Inf        | 1.2243784  | 1.1363907  | Secondary metabolites biosynthesis, transport and catabolism | Secondary metabolites biosynthesis, transport and catabolism | Cytochrome P450 82A3<br>GN=CYP82A3 OS=Glycine max (Soybean) PE=2 SV=1                                                       | hypothetical protein<br>POPTR_0014s03700g<br>[Populus trichocarpa] |
| P450-94A1  | Potri.005G<br>220700 | 2.161943<br>1 | -0.2921086 | 0.125900<br>0  | 1.5691581  | -0.1872032 | 0.0099573  | Secondary metabolites biosynthesis, transport and            | --                                                           | Cytochrome P450 94A1<br>GN=CYP94A1 OS=Vicia sativa (Spring vetch) PE=2 SV=2                                                 | cytochrome P450 CYP94A1 family protein<br>[Populus trichocarpa]    |

|           |                  |              |            |            |                    |            |            | catabolism                                                   |                                                              |                                                                                                                           |                                                                        |
|-----------|------------------|--------------|------------|------------|--------------------|------------|------------|--------------------------------------------------------------|--------------------------------------------------------------|---------------------------------------------------------------------------------------------------------------------------|------------------------------------------------------------------------|
| E3-1      | Potri.003G129900 | 2.4795037    | -0.3792936 | 0.0207984  | 0.7994301          | -0.2620306 | -0.1752268 | --                                                           | Posttranslational modification, protein turnover, chaperones | E3 ubiquitin-protein ligase At3g02290 OS=Arabidopsis thaliana (Mouse-ear cress) PE=2 SV=1                                 | hypothetical protein POPTR_0003s13000g [Populus trichocarpa]           |
| E3-ATL41  | Potri.019G091400 | Inf          | -0.8653536 | 0.7487184  | Inf                | -0.5988601 | 0.8086669  | Posttranslational modification, protein turnover, chaperones | Posttranslational modification, protein turnover, chaperones | E3 ubiquitin-protein ligase ATL41 GN=ATL41 OS=Arabidopsis thaliana (Mouse-ear cress) PE=1 SV=1                            | PREDICTED: E3 ubiquitin-protein ligase ATL41-like [Populus euphratica] |
| E3-HOS1   | Potri.001G155200 | 4.5850280    | -0.2916073 | 3.3240692  | 2.8085817          | -0.2151066 | 1.2004735  | --                                                           | --                                                           | E3 ubiquitin-protein ligase HOS1 GN=HOS1 OS=Arabidopsis thaliana (Mouse-ear cress) PE=1 SV=1                              | hypothetical protein POPTR_0001s15500g [Populus trichocarpa]           |
| E3-PUB24  | Potri.016G069500 | 5.1022681    | 0.9161986  | 0.2434006  | 2.8021461          | 1.6191521  | 0.7862702  | --                                                           | --                                                           | E3 ubiquitin-protein ligase PUB24 GN=PUB24 OS=Arabidopsis thaliana (Mouse-ear cress) PE=1 SV=1                            | U-box domain-containing family protein [Populus trichocarpa]           |
| E3-RING1  | Potri.009G034800 | 1.5288613    | -0.7628189 | 0.4043123  | 1.3859262          | -0.5671285 | 0.4036926  | --                                                           | Posttranslational modification, protein turnover, chaperones | E3 ubiquitin-protein ligase RING1 GN=RING1 OS=Gossypium hirsutum (Upland cotton) PE=1 SV=1                                | zinc finger family protein [Populus trichocarpa]                       |
| E3-XBAT32 | Potri.018G098400 | 1.2046783    | -0.5863591 | -0.1942831 | 1.5529142          | -0.7184409 | -0.1612685 | General function prediction only                             | --                                                           | E3 ubiquitin-protein ligase XBAT32 GN=XBAT32 OS=Arabidopsis thaliana (Mouse-ear cress) PE=1 SV=1                          | hypothetical protein POPTR_0018s10750g [Populus trichocarpa]           |
| E3-RHA2B  | Potri.005G081300 | 4.3300578    | -0.6439968 | 1.1005847  | 0.4369660          | -0.2758707 | --         | Posttranslational modification, protein turnover, chaperones | Posttranslational modification, protein turnover, chaperones | Probable E3 ubiquitin-protein ligase RHA2B GN=RHA2B OS=Arabidopsis thaliana (Mouse-ear cress) PE=1 SV=2                   | hypothetical protein POPTR_0005s08310g [Populus trichocarpa]           |
| GH3.5     | Potri.014G095500 | 1.2432051    | 0.4105617  | 0.0177268  | 0.3763779          | 0.2784618  | -0.1048236 | --                                                           | --                                                           | Probable indole-3-acetic acid-amido synthetase GH3.5 GN=OSJNBa0009C07.16 OS=Oryza sativa subsp. japonica (Rice) PE=2 SV=1 | hypothetical protein POPTR_0014s09120g [Populus trichocarpa]           |
| IAA28.1   | Potri.018G057000 | -0.767177141 | -0.464928  | -0.262477  | -1.471666210789773 | -0.680148  | -0.606031  | --                                                           | --                                                           | Auxin-responsive protein IAA26 GN=MDC8.13 OS=Arabidopsis thaliana (Mouse-ear cress) PE=1                                  | PREDICTED: auxin-responsive protein IAA2-like [Populus                 |



|         |                      |                  |          |                            |           |          |           |    |    |                                                                                                        |                                                                    |
|---------|----------------------|------------------|----------|----------------------------|-----------|----------|-----------|----|----|--------------------------------------------------------------------------------------------------------|--------------------------------------------------------------------|
| IAA28.2 | Potri.006G<br>236200 | -1.20651<br>0202 | 0.289221 | -0.62944<br>8988721<br>711 | -1.236529 | 0.510157 | -0.049081 | -- | -- | SV=2                                                                                                   | euphratica]                                                        |
|         |                      |                  |          |                            |           |          |           |    |    | Auxin-responsive protein IAA26<br>GN=MDC8.13 OS=Arabidopsis<br>thaliana (Mouse-ear cress) PE=1<br>SV=2 | hypothetical protein<br>POPTR_0006s25250g<br>[Populus trichocarpa] |

---

**Table S3.** The primer sequences for PCR amplification.

| Genes           | Gene ID          | Primer sequence F (5' to 3')                               | Primer sequence R (5' to 3')                                      |
|-----------------|------------------|------------------------------------------------------------|-------------------------------------------------------------------|
| ProPagFBLI::GUS | KY020444         | GGGGACAACCTTTGTACAAAAAAGTTGGATGGGCACGACGAAAACGGTTA<br>CCT  | GGCGGCCGCACAACCTTTGTACAAGAAAGTTGGGTAAACGAATTCGCCTTCTC<br>AA       |
| PagFBL1-OE      | KY020444         | GGGGACAACCTTTGTACAAAAAAGTTGGAATGTTGAGAAAGGCGAATTC          | GGCGGCCGCACAACCTTTGTACAAGAAAGTTGGGTACTAGGCCCGCAATGGTT<br>TCTG     |
| PagFBL1-SE      | KY020444         | TGACAGAGTTGAGGGTGTTCATC                                    | CTCCAACCTTTTGGCGTAAGTTCCA                                         |
| PagIAA16.4      | Potri.002G044900 | GGGGACAACCTTTGTACAAAAAAGTTGGAATGGAAGTGGAGAAGGGAAC<br>AA    | GGCGGCCGCACAACCTTTGTACAAGAAAGTTGGGTACTACTTGTAGCTTCTGTTC<br>TTGCAC |
| PagIAA28.1      | Potri.018G057000 | GGGGACAACCTTTGTACAAAAAAGTTGGAATGGAGGAATATATTCAGGGC<br>TT   | GGCGGCCGCACAACCTTTGTACAAGAAAGTTGGGTATCATCTTCCGATTTCTACT<br>GCAG   |
| PagIAA28.2      | Potri.006G236200 | GGGGACAACCTTTGTACAAAAAAGTTGGAATGGAGGAAAATACTCGGTGT<br>TTC  | GGCGGCCGCACAACCTTTGTACAAGAAAGTTGGGTATCATCTTCCAAGTTCTACT<br>GCACAA |
| PagIAA7.1       | Potri.010G078300 | GGGGACAACCTTTGTACAAAAAAGTTGGAATGGCAACAGCTACCGTGTTA<br>GGT  | GGCGGCCGCACAACCTTTGTACAAGAAAGTTGGGTATTACAGAAGCAAGCTGTT<br>GTTAATT |
| PagIAA7.2       | Potri.008G161200 | GGGGACAACCTTTGTACAAAAAAGTTGGAATGACAACCTTCTGTGCTAGGT<br>AC  | GGCGGCCGCACAACCTTTGTACAAGAAAGTTGGGTATCAGGTTCTGCTTTCAT<br>TTCTCC   |
| PagIAA19.1      | Potri.001G177500 | GGGGACAACCTTTGTACAAAAAAGTTGGAATGGCACAACCTTTGGACTA<br>G     | GGCGGCCGCACAACCTTTGTACAAGAAAGTTGGGTATCAGTCACGATCATCTTT<br>GAAATA  |
| PagIAA20.1      | Potri.002G186400 | GGGGACAACCTTTGTACAAAAAAGTTGGAATGGGCAGAGGAGCTGCCTCT<br>A    | GGCGGCCGCACAACCTTTGTACAAGAAAGTTGGGTATCATAGGCTGTCTGCCCT<br>GGTGATC |
| PagIAA9         | Potri.002G108000 | GGGGACAACCTTTGTACAAAAAAGTTGGAATGTCTCCACCACTACTTGGT<br>GTT  | GGCGGCCGCACAACCTTTGTACAAGAAAGTTGGGTATCAGAACAGTAGTAAAT<br>TGGCTTG  |
| PagIAA16.1      | Potri.005G053900 | GGGGACAACCTTTGTACAAAAAAGTTGGAATGACCAGCATAATGGGAGCA         | GGCGGCCGCACAACCTTTGTACAAGAAAGTTGGGTATCAAAGCTCAATGAGCCT<br>GCATGTT |
| PagIAA16.2      | Potri.013G041400 | GGGGACAACCTTTGTACAAAAAAGTTGGAATGACTAGCATAATGGGAGCA<br>GAA  | GGCGGCCGCACAACCTTTGTACAAGAAAGTTGGGTATCAAATTCTGTTCTTGCAC<br>TTCTCT |
| PagIAA16.3      | Potri.005G218300 | GGGGACAACCTTTGTACAAAAAAGTTGGAATGGAAGTAGAGAAGGGAAC<br>AAAGA | GGCGGCCGCACAACCTTTGTACAAGAAAGTTGGGTACTACTTGAAGCTTCTGTTC<br>TTGCAT |

|            |                  |                                                            |                                                                    |
|------------|------------------|------------------------------------------------------------|--------------------------------------------------------------------|
| PaglAA27.1 | Potri.006G161400 | GGGGACAACCTTTGTACAAAAAAGTTGGAATGTCTATGCCCTTAGAGCAT<br>GAT  | GGCGGCCGCACAACCTTTGTACAAGAAAGTTGGGTACTAGTTACGACTTTGCAC<br>TTCTCC   |
| PaglAA29.2 | Potri.018G127800 | GGGGACAACCTTTGTACAAAAAAGTTGGAATGGAACCTCAACTTGGTCTC<br>GGTC | GGCGGCCGCACAACCTTTGTACAAGAAAGTTGGGTATCAGCTGCTTCTCCTCATC<br>AATTTT  |
| PaglAA29.3 | Potri.006G066600 | GGGGACAACCTTTGTACAAAAAAGTTGGAATGGAACCTCAACTTGGTCTC<br>GGTC | GGCGGCCGCACAACCTTTGTACAAGAAAGTTGGGTATCAATTGCTGCTCCTCATC<br>AGTTTT  |
| PaglAA12.1 | Potri.010G065200 | GGGGACAACCTTTGTACAAAAAAGTTGGAATGATGGAAGGCTGTCTTGGT<br>TTA  | GGCGGCCGCACAACCTTTGTACAAGAAAGTTGGGTACTAAACAGGCTTGTCTTCTT<br>TGTTTC |

---

**Table S4.** The stability of reference genes evaluated by different algorithms.

| Reference gene       | GeNorm (M value) | NormFinder | BestKeeper       |           |
|----------------------|------------------|------------|------------------|-----------|
|                      |                  |            | std dev [+/- CP] | CV [% CP] |
| PagUBQ               | 0.634 (1)        | 0.009 (1)  | 0.34 (2)         | 1.86      |
| PagACTIN             | 0.649 (2)        | 0.012 (3)  | 0.34 (1)         | 1.62      |
| PagPP2A-2            | 0.662 (3)        | 0.011 (2)  | 0.57 (6)         | 2.09      |
| PagHistone           | 0.667 (4)        | 0.013 (4)  | 0.49 (4)         | 1.93      |
| PagGAPDH             | 0.675 (5)        | 0.014 (6)  | 0.35 (3)         | 1.5       |
| PagRPS18             | 0.743 (6)        | 0.013 (5)  | 0.68 (7)         | 2.18      |
| PagEF1A              | 0.784 (7)        | 0.015 (7)  | 0.78 (8)         | 2.37      |
| Pag $\beta$ -tubulin | 0.876 (8)        | 0.025 (8)  | 0.54 (5)         | 1.93      |
| PagCYP 59            | 1.016 (9)        | 0.028 (9)  | 1.04 (9)         | 3.25      |
| PagEF1B              | 1.115 (10)       | 0.033 (10) | 1.11 (11)        | 3.54      |
| PagPP2A-A2           | 1.180 (11)       | 0.037 (11) | 1.08 (10)        | 3.79      |

1-11: The rankings of the reference genes.

**Table S5.** The primer sequences used in real-time quantitative PCR.

| Genes                | Gene ID          | Primer sequence F (5' to 3') | Primer sequence R (5' to 3')   |
|----------------------|------------------|------------------------------|--------------------------------|
| Pag26S-4             | Potri.015G007800 | GTGCAGTGGAGCAATGAGAA         | CCATGGTAGCTGGATGTGTG           |
| Pag26S-8             | Potri.007G020800 | CACTCCGCTTCTCTGTTC           | TGGGGTATTAATGGCCAAA            |
| PagGH3.1             | Potri.007G050300 | GCCCCAACGAGACAATTCTA         | TTGGCAAGCTCTTCCAGTT            |
| PagGH3.6             | Potri.014G136800 | GTTCCACCACGACCTGAAGT         | GCACAGAGCAGATGGCAATA           |
| PagARF5.2            | Potri.005G236700 | GTGGTTCTGTGGTCGATCCT         | AGGAAAGTCTTGCCGTGAGA           |
| PagARF5.1            | Potri.002G024700 | CAATGCAACCACCATCTCAG         | CTCACACCACCATCAAGTG            |
| PagP450-705A5        | Potri.001G270900 | GGAGCAGCCAGATGAAGAAG         | ATTATCTTCCCCGAACACC            |
| PagE3-HOS1           | Potri.001G155200 | CAGCTGCAATTAAGCGTTCA         | CTTGCAAAAACAACCTCCAT           |
| PagE3-PUB24          | Potri.016G069500 | TGTTGTTGTCTGAGGGAAG          | GGATCACCATGCTTGTTCCT           |
| PagUBQ               | BU879229         | GTTGATTTTTGCTGGGAAGC         | GATCTTGGCCTTCACGTTGT           |
| PagFBL1              | KY020444         | GCCTCTTCTTCAAGGATCG          | AAGCAGCATCCAATAGCTCA           |
| PagIAA16.4           | Potri.002G044900 | CCTCCGTAAGTGGACCTGA          | CCAATCACCGTCCTTGTCTT           |
| PagIAA28.1           | Potri.018G057000 | AACTCTCTGTTGCCATAGATGAACT    | GTTGTTACCAACTGAAAGTTGTGGA      |
| PagIAA28.2           | Potri.006G236200 | CCCAGTTGGAGCAAAAACAT         | TGGCTTGGGCTTCTGTAACCT          |
| PagFBL1              | KY020444         | CACCATGTGTTGTCTGGGTG         | TTCTGACCCAGCAGCTTACA           |
| PagIAA7.1            | Potri.010G078300 | AAGAACCACCTTCTGTGTA          | ACTGGCGTTCTTCTGAGTCA           |
| PagIAA7.2            | Potri.008G161200 | AGAACCACCTTCTGTGTT           | ACCATCCATGCAGACCTTCA           |
| PagIAA19.1           | Potri.001G177500 | AACGAGTCAAGTTGTGGGGT         | CGCGACAACAAGATCCGAAT           |
| PagIAA20.1           | Potri.002G186400 | TGAGTGCTGTAGTTCACCT          | GGCATTCCCAGGAATGTCA            |
| PagIAA9              | Potri.002G108000 | AAGGCAGGACAAGAGAGACC         | GGCCCTGCTTACCATCAAC            |
| PagIAA16.1           | Potri.005G053900 | GAGGCTGCAAAGGTAATGG          | GTTGCTGTTCTTCTGGACGG           |
| PagIAA16.2           | Potri.013G041400 | GGCCTCTACTGATCCTGCAA         | GCCTAGAGCGTCAGAGAGTT           |
| PagIAA16.3           | Potri.005G218300 | ATGCGGTTTGAGGAGACAGA         | TAGCTGGAGGTTTTGCTGGA           |
| PagIAA27.1           | Potri.006G161400 | TGGCAGCTACATGGAACCTCT        | CGGTGAACATCTTCCAAGGC           |
| PagIAA29.2           | Potri.018G127800 | GATGGGCCTCAAACGTTACC         | CGATTGATCTCTAGCGCCCT           |
| PagIAA29.3           | Potri.006G066600 | GGTCTCGGTCTTCCAAGTGA         | CATCTTCTCGTTTGGCTGG            |
| PagIAA12.1           | Potri.010G065200 | CATCTTGGATTTGTCAAGGTGA       | ACGACCCATCCAATAGCTTAGA         |
| PagACTIN             | Potri.001G309500 | AAACTGTAATGGTCCTCCCTCCG      | GCATCATCACAATCACTCTCCGA        |
| PagPP2A-2            | Potri.010G127500 | ATGAATTTCTGATGTGCGACT        | CAATGCCTATCTCTGCAAGCTC         |
| PagHistone           | Potri.005G072300 | ACTGTTGCTCTTCGTGAAATCCGTA    | CTTAAAATCCTGGCAATTTACGAA<br>AC |
| PagGAPDH             | Potri.012G094100 | AACCGACTTCATTGGTGACAACCG     | CCACTCATTGTCATACCACGCAAC       |
| PagRPS18             | Potri.006G170500 | AGGCTCATCATTTATCAAATCCCT     | TCAATGCCACCAAATATTCGTTGCT      |
| PagEF1A              | Potri.006G275500 | TACATCTTTCGGGACGGATAACCCAA   | TTCAGGACTCTCATCCAATGCCCAA      |
| Pag $\beta$ -tubulin | Potri.001G464400 | CGTGCTGTTCTTATGGATCTGAACCTG  | TGCCCTTTAGCCCAGTTATTACCAG      |

|          |                  |                           |                           |
|----------|------------------|---------------------------|---------------------------|
| PagCYP59 | Potri.005G097500 | GAGACAAAGCCTCCTGATAATGTCC | CCGATATAACAGTTCCAAAGCGTGA |
| PagEF1B  | Potri.001G225200 | ACATCTAATCATCCAGTCCGGCAAG | TCGCCTCTCCTTTTGACGCTGA    |

---

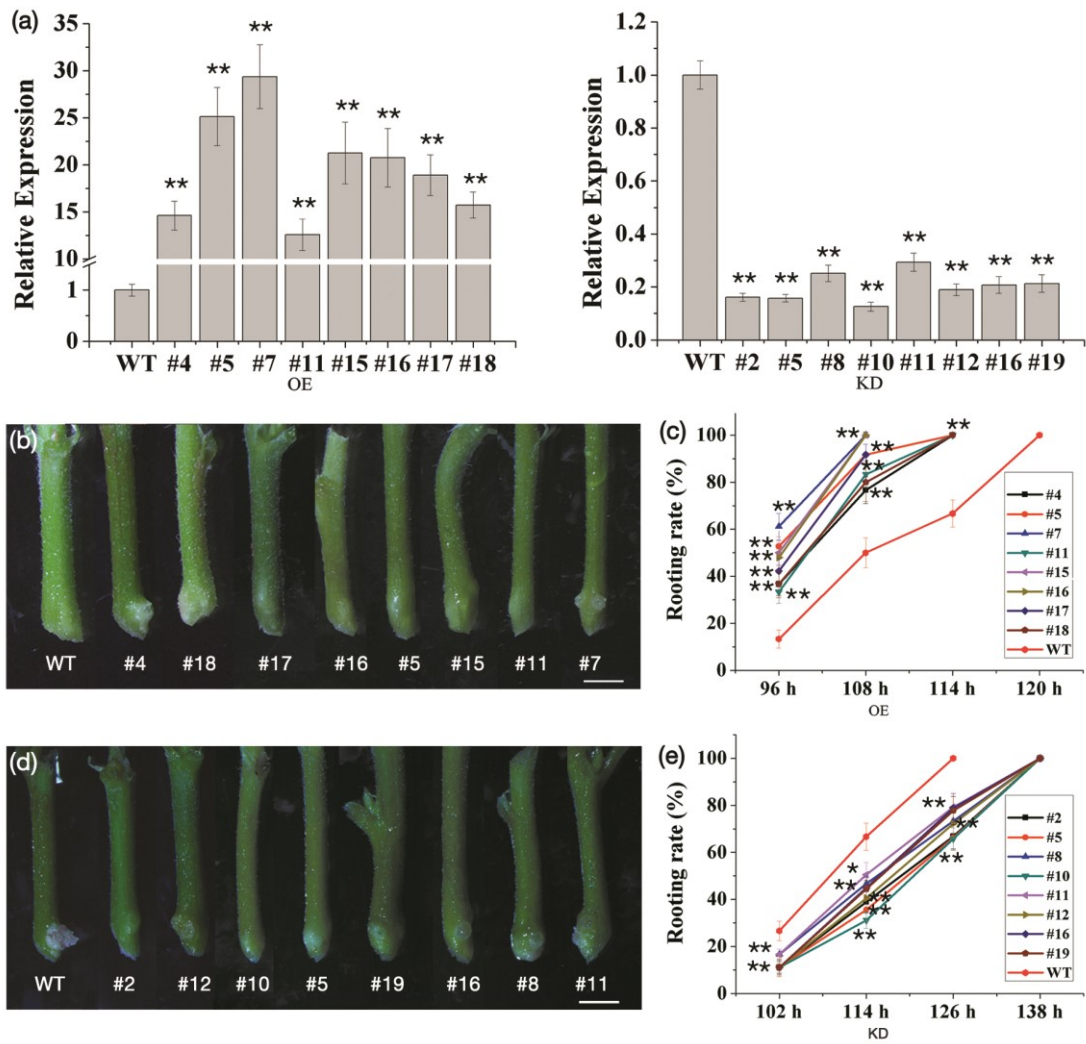

**Figure S1.** AR formation in 8 *PagFBL1* OE and KD lines. (a) Expression of *FBL1* by qRT-PCR analysis respectively. (b, c) AR rooting rates from leafy stems of 8 OE lines. (d, e) AR rooting rates of 8 KD lines. Bars = 1 cm. The values are means  $\pm$  SE of 3 replicates. Significant differences between WT and transgenic lines are indicated with asterisks (\*  $P < 0.05$  and \*\*  $P < 0.01$ ).

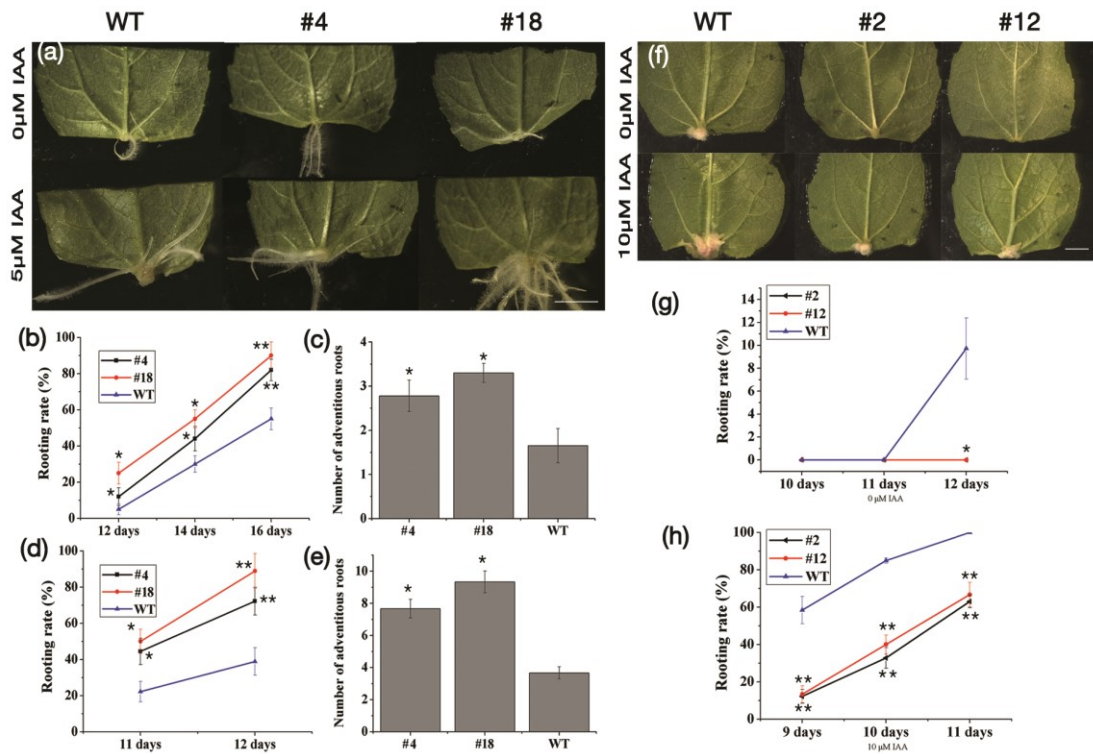

**Figure S2.** ARs from leaves of WT, *PagFBL1* OE lines #4 and #18 and KD lines #2 and #12 treated with (d, e, h) or without (b, c, g) IAA. (b, d) The induction rates of AR of WT and OE lines accessed during 11 and 16 days. (a, c, e) The number of ARs counted after 1 month for OE and WT lines. (f, g, h) ARs induction rate of WT and KD lines treated with or without IAA (10μM). Bars = 5 mm. The values are means  $\pm$  SE of 3 replicates. Significant differences between WT and transgenic lines are indicated with asterisks (\*  $P < 0.05$  and \*\*  $P < 0.01$ ).



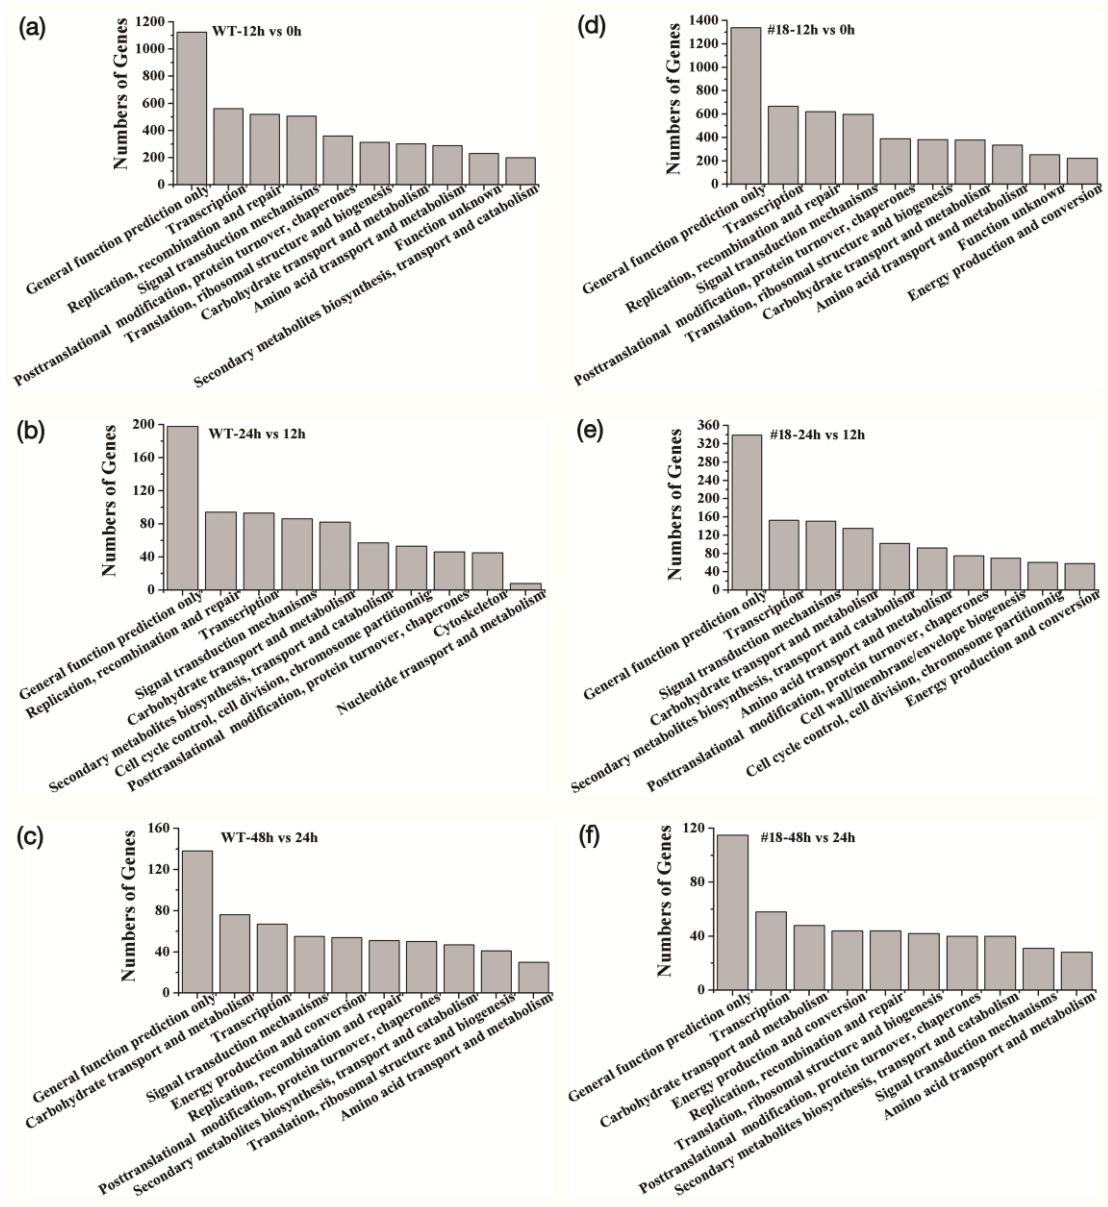

**Figure S3.** COG classification of DEGs. (a) 12 h vs 0 h in WT. (b) 24 h vs 12 h in WT. (c) 48 h vs 24 h in WT. (d) 12 h vs 0 h in #18. (e) 24 h vs 12 h in #18. (f) 48 h vs 24 h in #18.

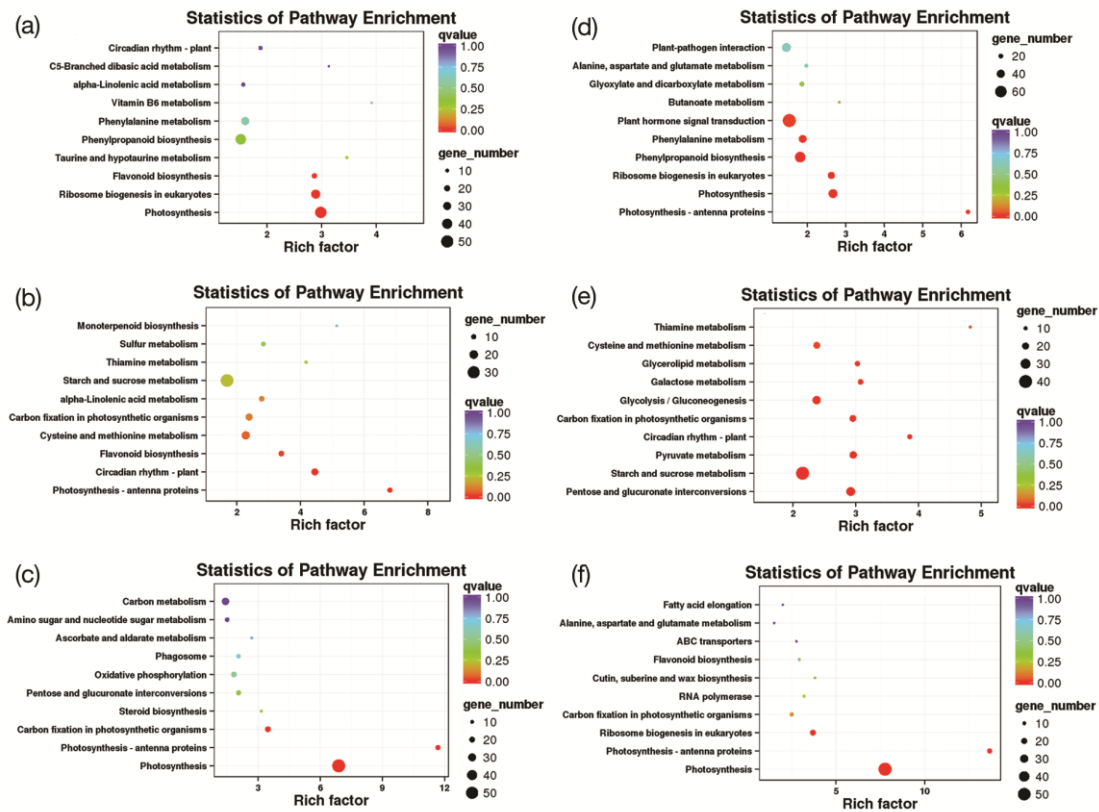

**Figure S4.** KEGG pathway of DEGs. (a) 12 h vs 0 h in WT. (b) 24 h vs 12 h in WT. (c) 48 h vs 24 h in WT. (d) 12 h vs 0 h in #18. (e) 24 h vs 12 h in #18. (f) 48 h vs 24 h in #18.

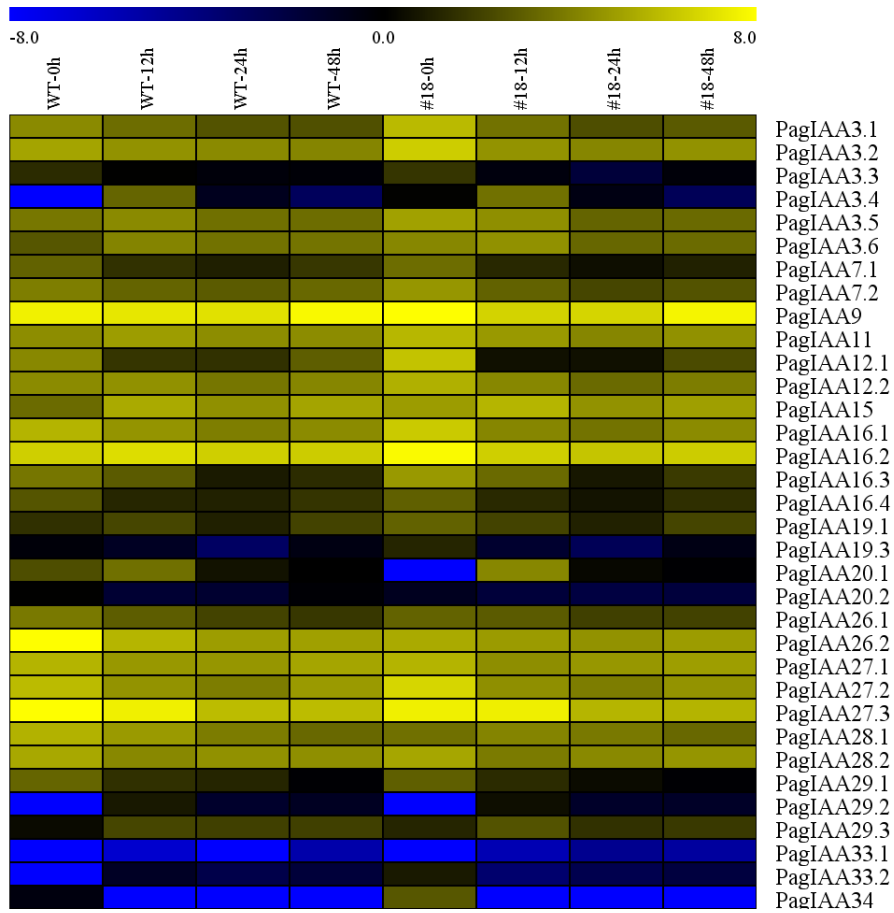

**Figure S5.** Heat map showing the expression patterns of *PagIAAs* during AR formation from OE transgenic line (#18) and WT at four time points.

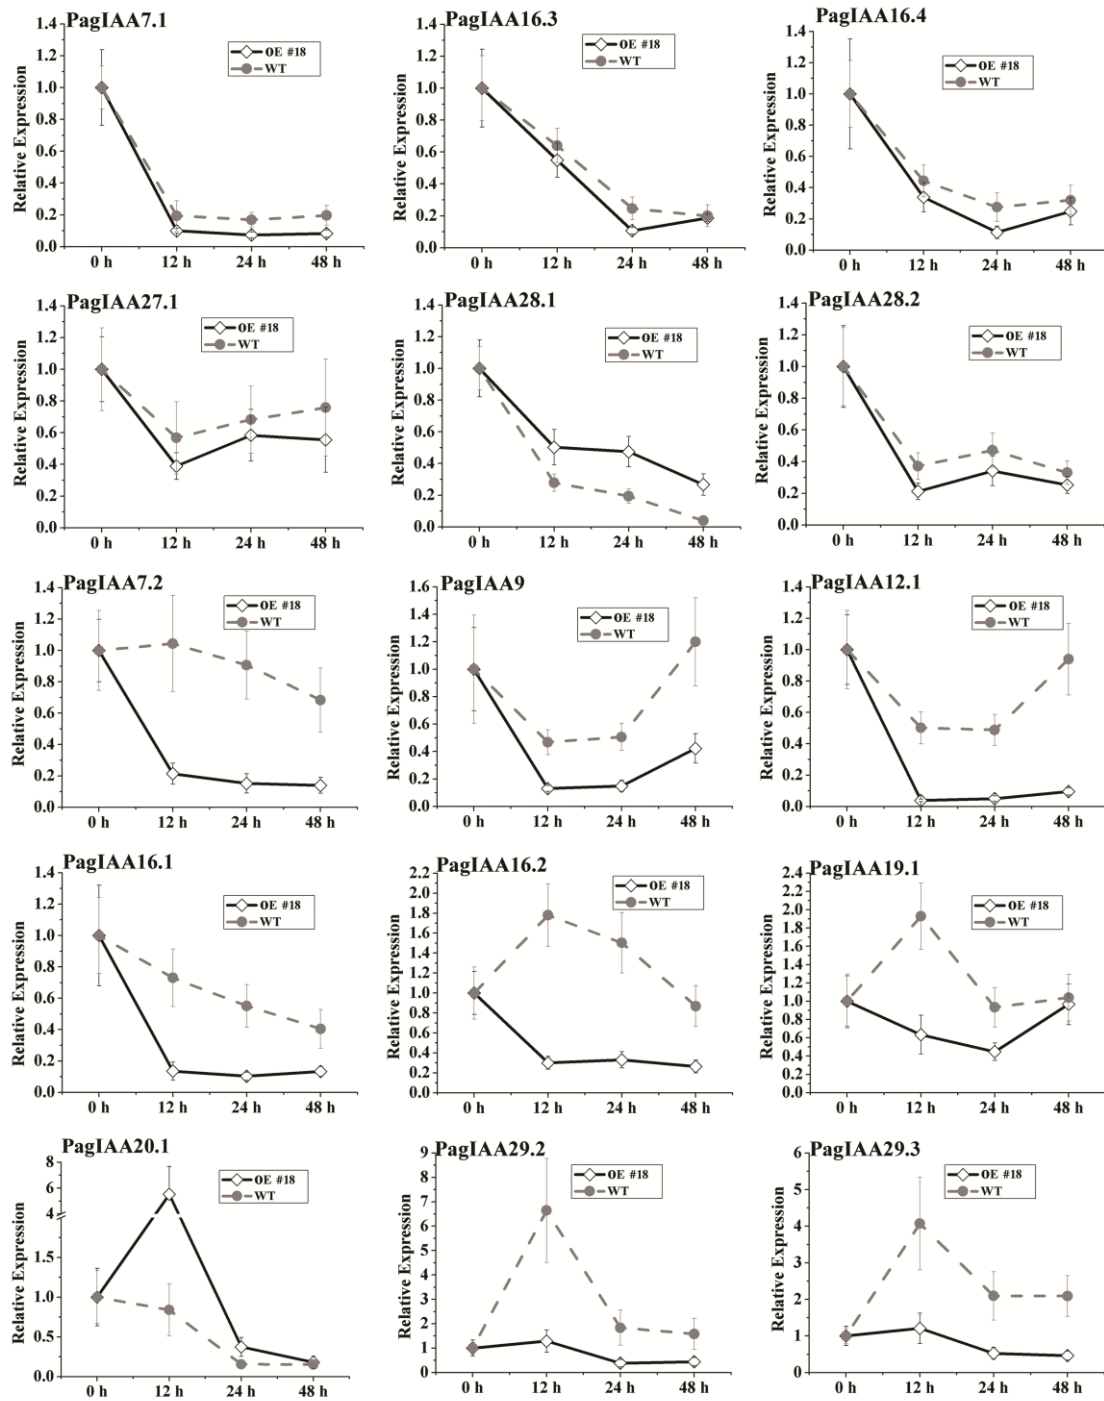

**Figure S6.** The expressions of 15 *PagIAAs* during AR induction by qRT-PCR.

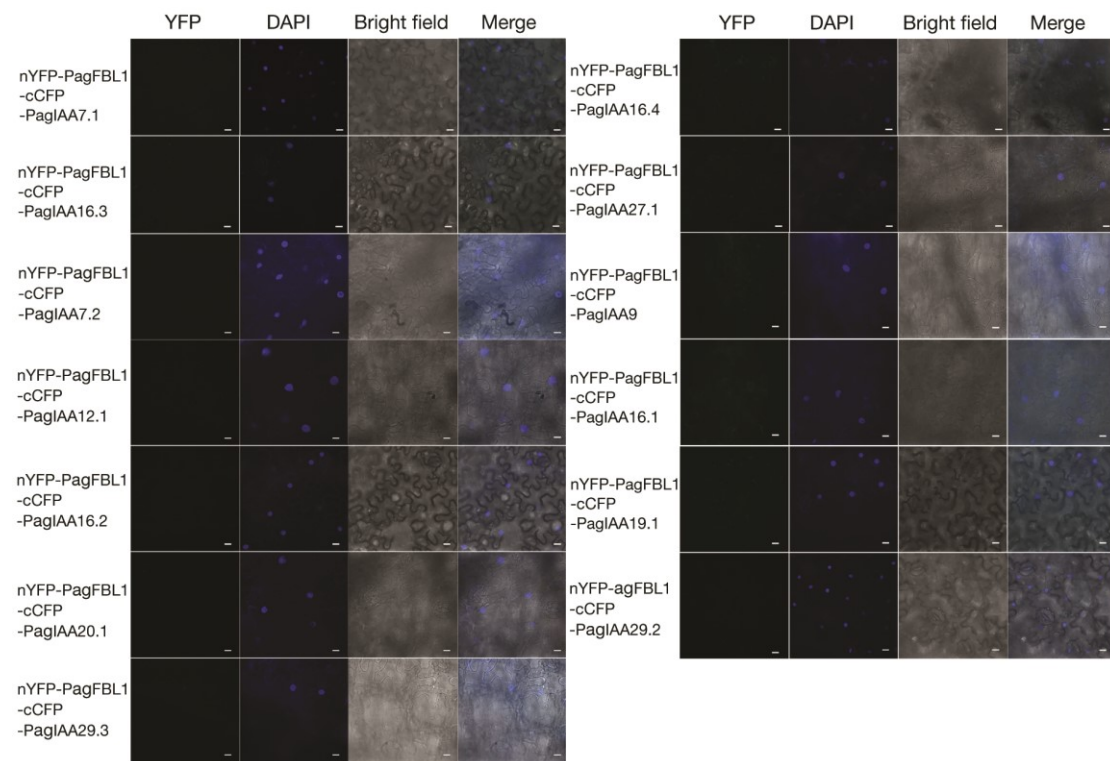

**Figure S7.** Interaction between PagFBL1 and PagIAA7.1, 7.2, 9, 12.1, 16.1, 16.2, 16.3, 16.4, 19.1, 20.1, 27.1, 29.2 or 29.3 with 100  $\mu$ M NAA, respectively. Bars = 12  $\mu$ m.
